# Supplementary material for: Leveraging snow probe data, lidar, and machine learning for snow depth estimation in complex-terrain environments
Source: Copernicus journal article supplement (doi:10.5194/tc-19-3123-2025), 2025-08-18
Supplement: Supplementary file 1 [file tc-19-3123-2025-supplement.pdf]

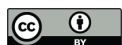

*Supplement of*

## **Leveraging snow probe data, lidar, and machine learning for snow depth estimation in complex-terrain environments**

**Dane Liljestrand et al.**

*Correspondence to:* Dane Liljestrand ([dane.liljestrand@utah.edu](mailto:dane.liljestrand@utah.edu))

The copyright of individual parts of the supplement might differ from the article licence.

## S1 Supplemental Materials

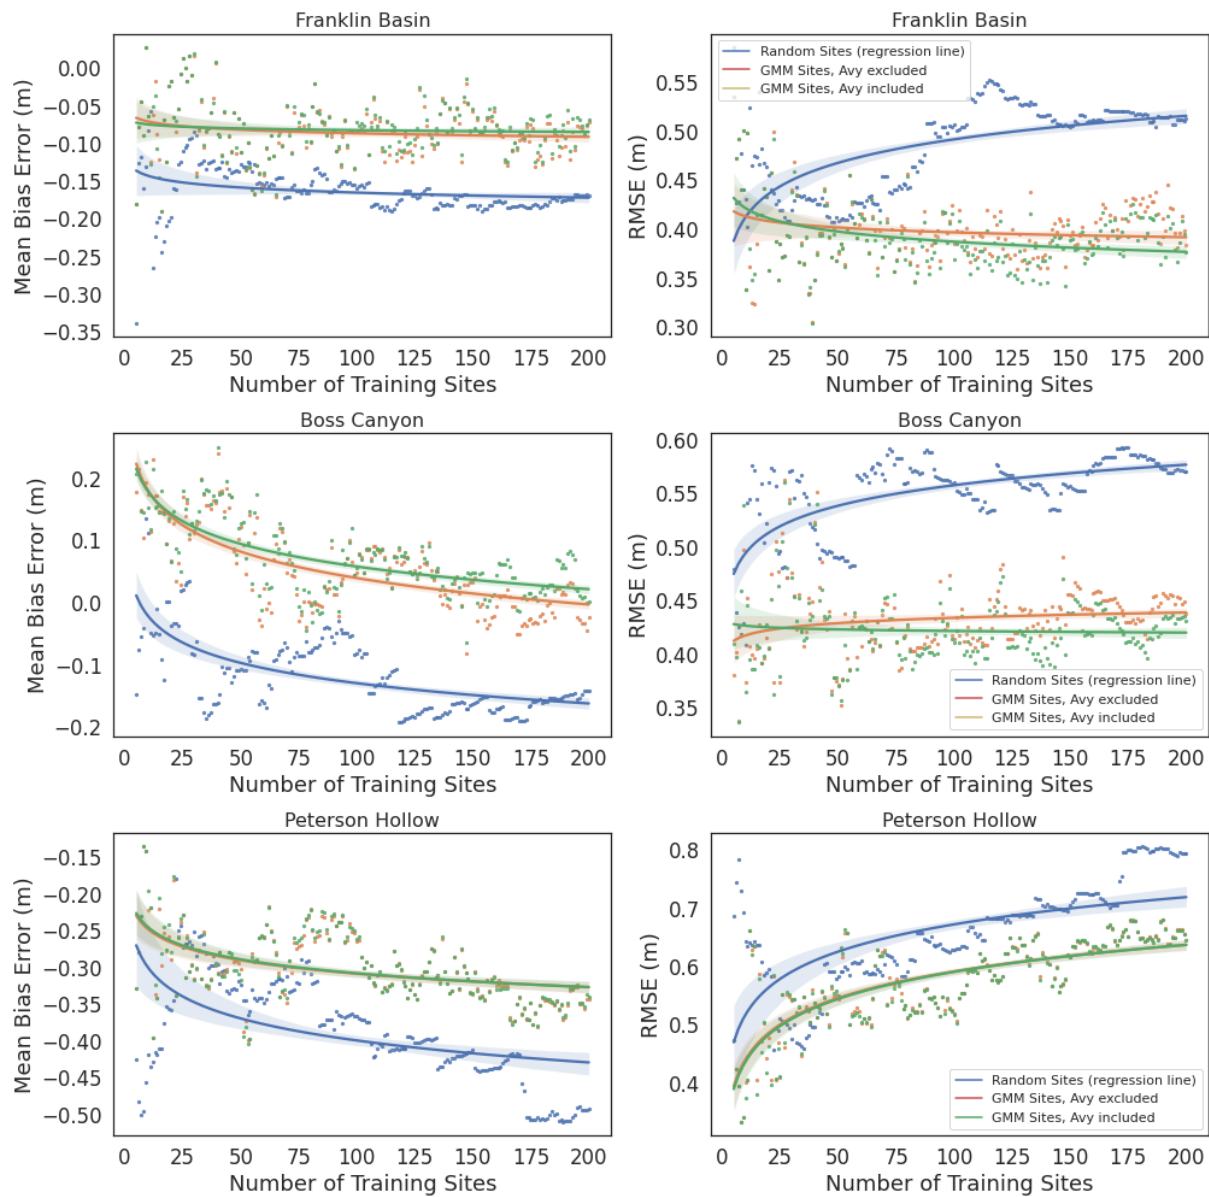

**Figure S1.** Model sensitivity analysis
